# Supplementary material for: Variation of hair cortisol in two herds of migratory caribou (Rangifer tarandus): implications for health monitoring
Source: PubMed Central journal article supplement (PMC10203588; doi:10.1093/conphys/coad030), 2023-05-22
Supplement: web_material_coad030.pdf [file web_material_coad030.pdf]

## Supporting Information

### Variation of Hair Cortisol in Two Herds of Migratory Caribou (*Rangifer tarandus*):

#### Implications for Health Monitoring

Filip Rakic, Javier Fernández-Aguilar, Mathieu Pruvot, Douglas Whiteside, Gabriella

Mastromonaco, Lisa-Marie Leclerc, Naima Jutha, and Susan Kutz

**Table S1.** Model estimates of linear-mixed effect model evaluating the effects of body location (neck reference category)

|           | Coef   | SE    | DF | t-value | p-value |
|-----------|--------|-------|----|---------|---------|
| Intercept | 1.67   | 0.053 | 51 | 31.37   | <0.001  |
| Rump      | -0.236 | 0.066 | 51 | -3.61   | <0.001  |

**Table S2.** Summary of linear mixed effect model evaluating the effects of body location

|                                  |       |
|----------------------------------|-------|
| Number of observations           | 104   |
| Number of groups                 | 52    |
| Intercept variance (between)     | 0.035 |
| Error/Residual variance (within) | 0.111 |
| Marginal R <sup>2</sup>          | 0.09  |
| Conditional R <sup>2</sup>       | 0.31  |
| ICC                              | 0.241 |

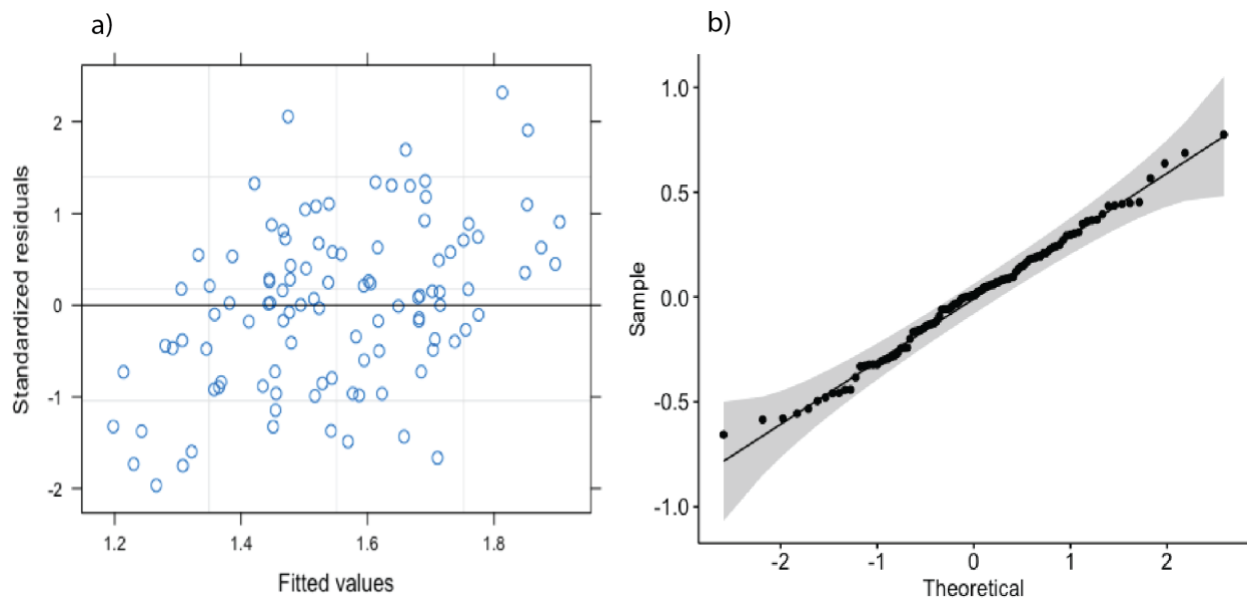

**Figure S1.** Summary of model fit for body location. A) corresponds to the residuals vs fitted values B) corresponds to a qqplot of the residuals.

**Table S3.** Summary of top 4 dredged models out of 256 total possible combinations. No top models included an interaction between parameters. Model number (#), included parameters (+ = included, - = excluded), df, AICc, change in AICc (delta), and % model weight into average.

| # | Year | Bod Loc | Herd | MI | OI | Month | Sex | Method | df | AICc     | delta | weight |
|---|------|---------|------|----|----|-------|-----|--------|----|----------|-------|--------|
| 1 | +    | +       | +    | +  | +  | +     | +   | +      | 12 | 2246.768 | 0.00  | 0.37   |
| 2 | -    | +       | +    | +  | +  | +     | +   | +      | 11 | 2247.004 | 0.235 | 0.33   |
| 3 | +    | +       | +    | +  | +  | +     | -   | +      | 11 | 2248.496 | 1.728 | 0.16   |
| 4 | +    | +       | +    | +  | +  | +     | +   | -      | 11 | 2248.728 | 1.959 | 0.14   |

**Table S4.** Summary of averaged model parameters obtained from averaged global model (from Table S3) predicting log caribou hair cortisol concentration, n=407, outliers present. Reference categories in paratheses.

| Covariates                 | Estimate (2.5%: 97.5%) | Std. Error | Z -value | p-value |
|----------------------------|------------------------|------------|----------|---------|
| Year                       | -0.390 (-0.77: -0.14)  | 0.191      | 2.03     | 0.042   |
| Hair loc-unknown (rump)    | -0.67 (-1.79: 1.65 )   | 0.877      | 0.08     | 0.903   |
| Hair loc – Neck (rump)     | 2.921 (1.47: 4.37)     | 0.734      | 3.95     | <0.001  |
| Hair loc – Shoulder (rump) | -0.691 (-2.91: 1.53)   | 1.13       | 0.61     | 0.527   |
| Herd (BNE)                 | 2.836(1.57: 4.10)      | 0.644      | 4.29     | <0.001  |
| MI                         | 6.46(-26.05: 38.91)    | 16.53      | 0.39     | 0.697   |
| Month (1-6)                | 1.01(0.60: 1.40)       | 0.204      | 4.89     | <0.001  |
| OI                         | -4.602(-36.79: 27.56)  | 16.378     | 0.28     | 0.739   |
| Sex (Female)               | -0.870 (-1.75: 0.049)  | 0.445      | 1.94     | 0.051   |
| Method (Capture)           | -1.211 (-2.35: -0.068) | 0.581      | 2.08     | 0.043   |

**Table S5.** Summary of averaged model parameters obtained from averaged global model (from Table S3) predicting log caribou hair cortisol concentration, n=403, outliers removed. Reference categories in paratheses.

| Covariates                 | Estimate (2.5%: 97.5%) | Std. Error | Z -value | p-value |
|----------------------------|------------------------|------------|----------|---------|
| Year                       | -0.35 (-0.57: -0.12)   | 0.114      | 3.04     | 0.002   |
| Hair loc-unknown (rump)    | -0.07 (-0.93: 1.07)    | 0.512      | 0.13     | 0.897   |
| Hair loc – Neck (rump)     | 2.811 (2.02: 3.60)     | 0.405      | 6.93     | <0.001  |
| Hair loc – Shoulder (rump) | -0.572 (-1.86: 0.71)   | 0.657      | 0.87     | 0.383   |
| Herd (BNE)                 | 2.990 (2.25: 3.72)     | 0.377      | 8.01     | <0.001  |
| MI                         | 6.198 (-12.30: 24.70)  | 9.44       | 0.66     | 0.511   |
| Month (1-6)                | 0.862 (0.63: 1.10)     | 0.13       | 7.18     | <0.001  |
| OI                         | -10.782 (-28.95: 7.28) | 9.27       | 1.16     | 0.244   |
| Sex (Female)               | -0.374 (-0.90: 0.15)   | 0.27       | 1.39     | 0.165   |
| Method (Capture)           | -1.702 (-2.37: -1.02)  | 0.344      | 4.94     | <0.001  |
